# Supplementary material for: Hemodynamic matrix factorization for functional magnetic resonance imaging
Source: PubMed Central journal article supplement (PMC8210649; doi:10.1016/j.neuroimage.2021.117814), 2021-05-01
Supplement: mmc1.pdf [file mmc1.pdf]

576 **Supplementary Material**

577 *Average estimated HRF per MSC subject*

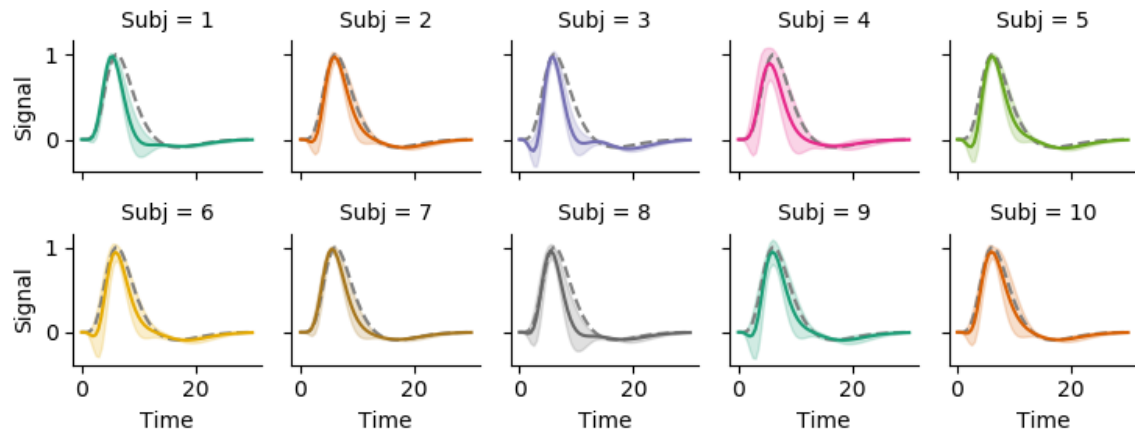

Figure S1: The average HRF (mean and standard deviation) for subject 1-10 of the MSC cohort estimated from the incidental memory tasks.

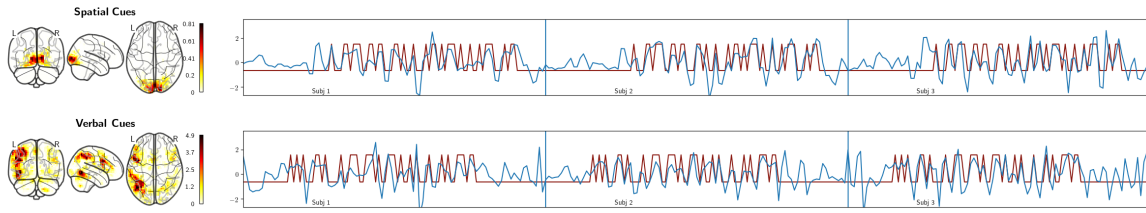

Figure S2: The task timings of coherent and incoherent stimuli combined (dark red line) for the spatial discrimination task (first row) and noun and verbal stimuli for the verbal discrimination task (second row). The spatial map and neural activation time course estimate (blue line) of the most task-relevant mode for either spatial disc. (first row) and verbal disc. (second row) task obtained with canonical HMF.

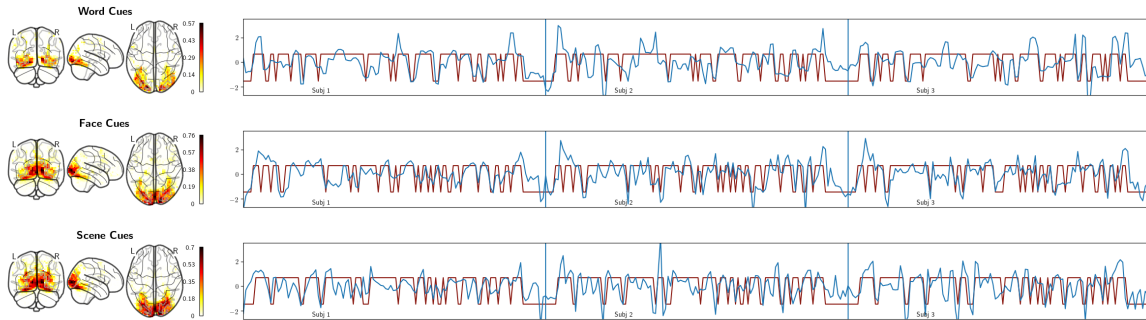

Figure S3: All task stimuli combined for either word (first row), face (second row) and scene incidental memory task (third row). Spatial map and neural activation time course estimate of the most task-relevant mode for the respective incidental memory task obtained with canonical HMF.

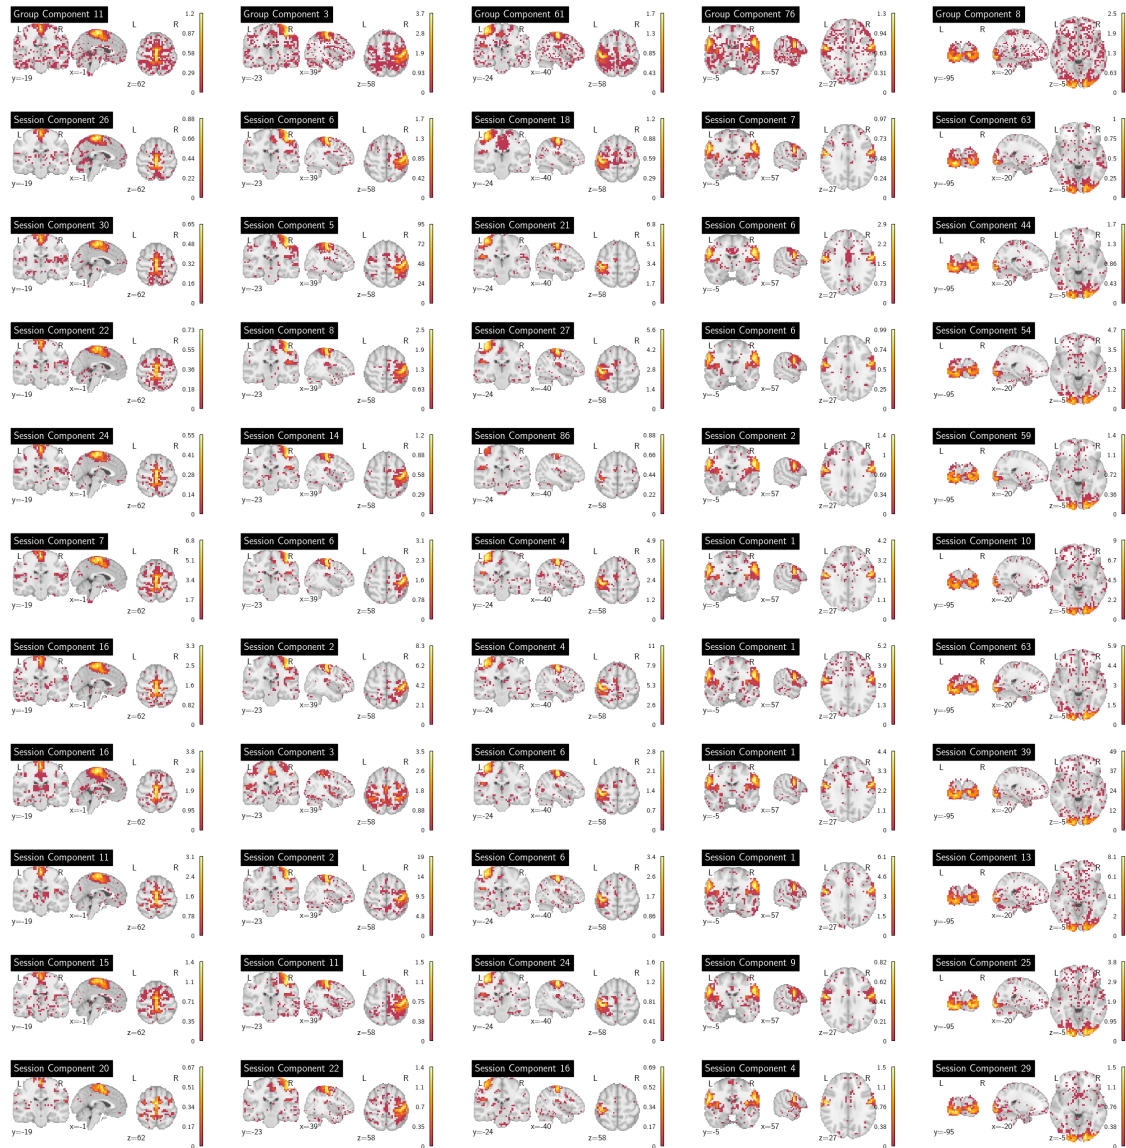

Figure S4: The first row contains the average spatial map of spatial maps of corresponding modes for session 1-10 (second to last row) for foot, left hand, right hand, tongue movement, and motor cues (left to right column). All modes were found among 40 modes in a canonical HMF decomposition in each session.

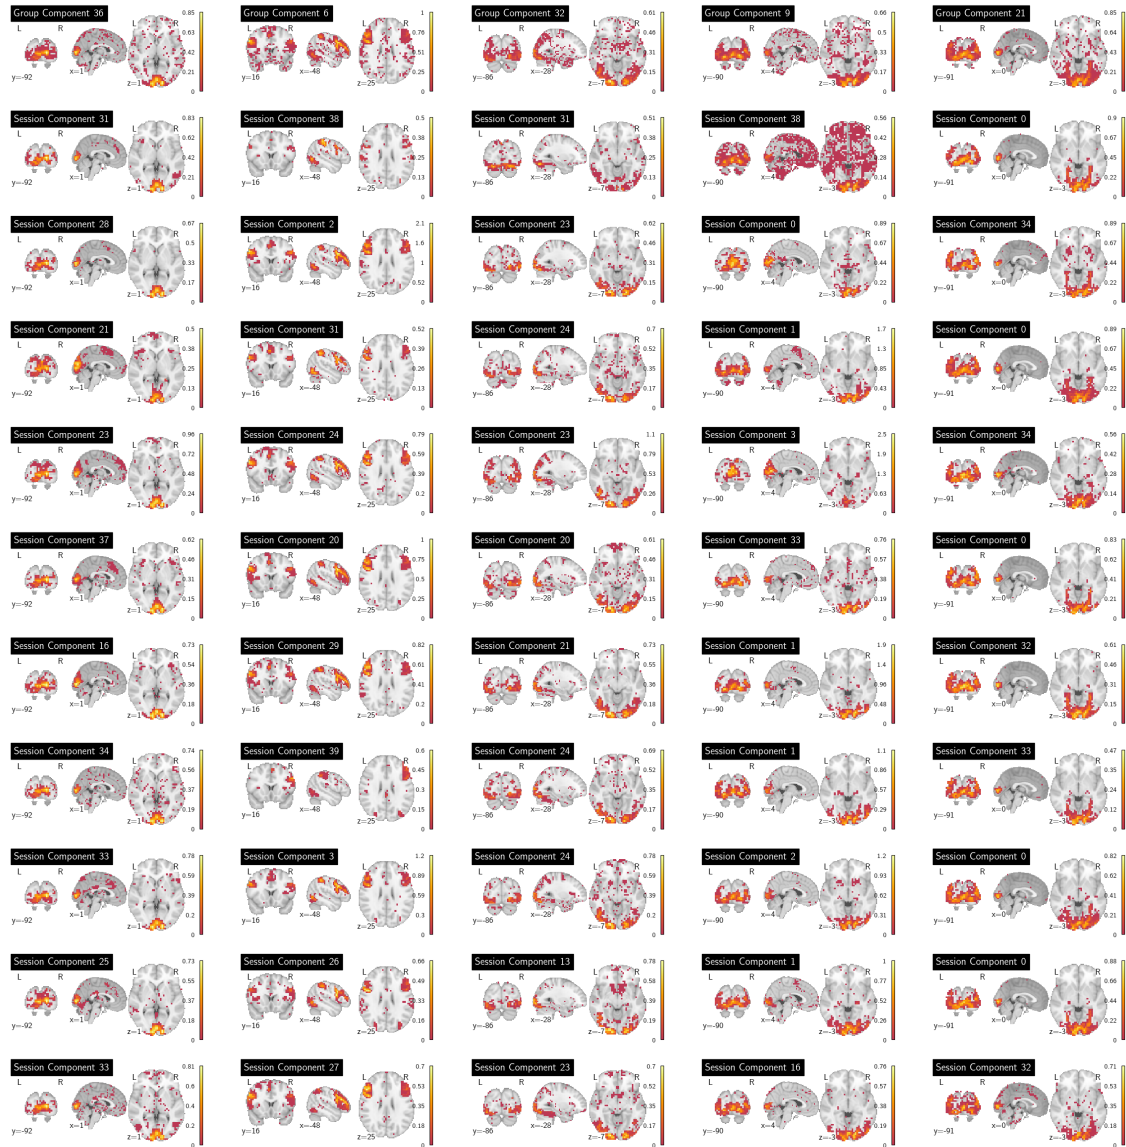

Figure S5: The first row contains the average spatial map of spatial maps of corresponding modes for session 1-10 (second to last row) for spatial and verbal discrimination task stimuli and incidental memory stimuli (words, faces, scenes). All modes were found among 40 modes in a canonical HMF decomposition in each session.

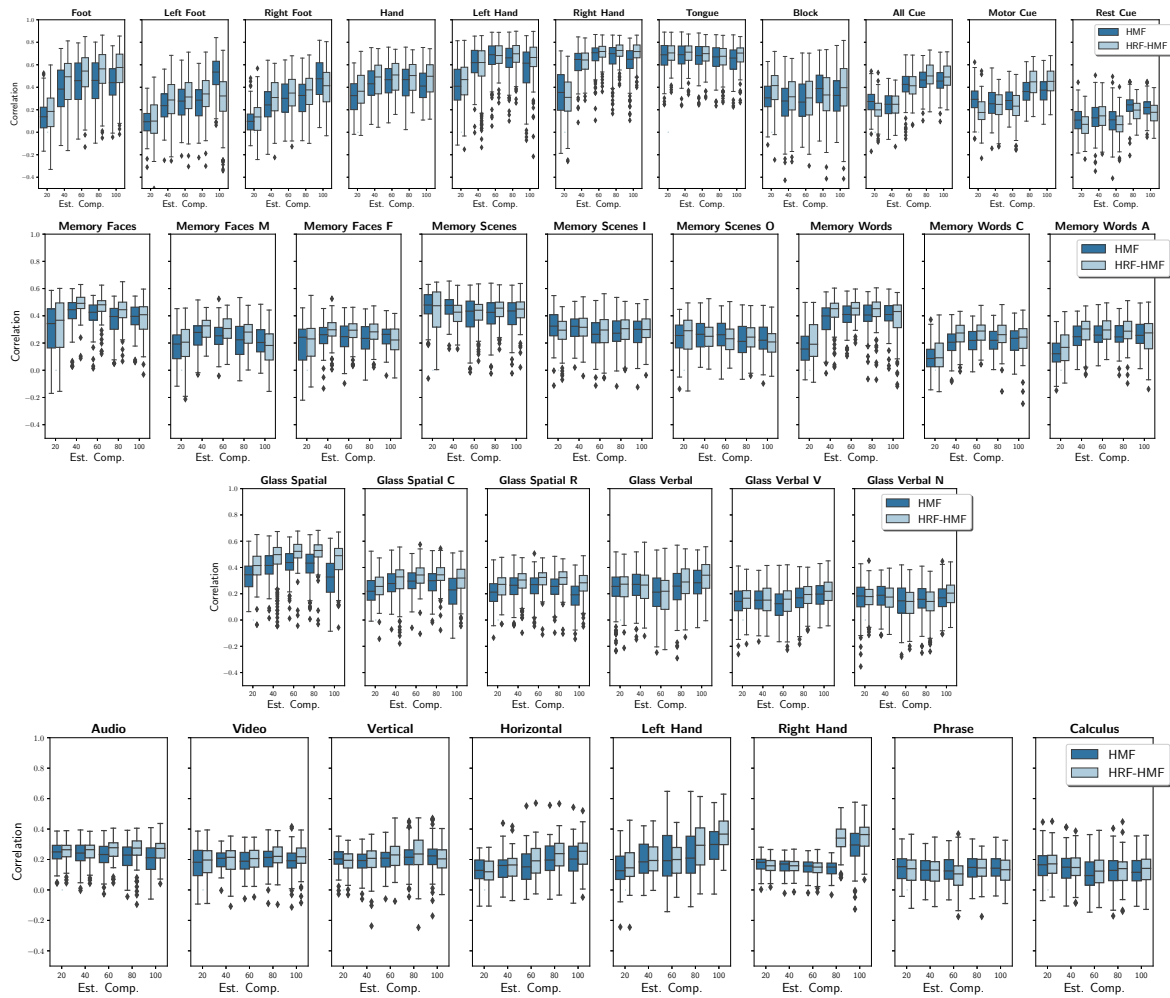

Figure S6: Correlation between task timing and neural activation estimate of the most task-relevant mode for canonical and subject-specific HMF dependent on the number of estimated modes. Motor task (1st row), incidental memory task (2nd row), glasslexical task (3rd row) and Brainomics task (4th row).

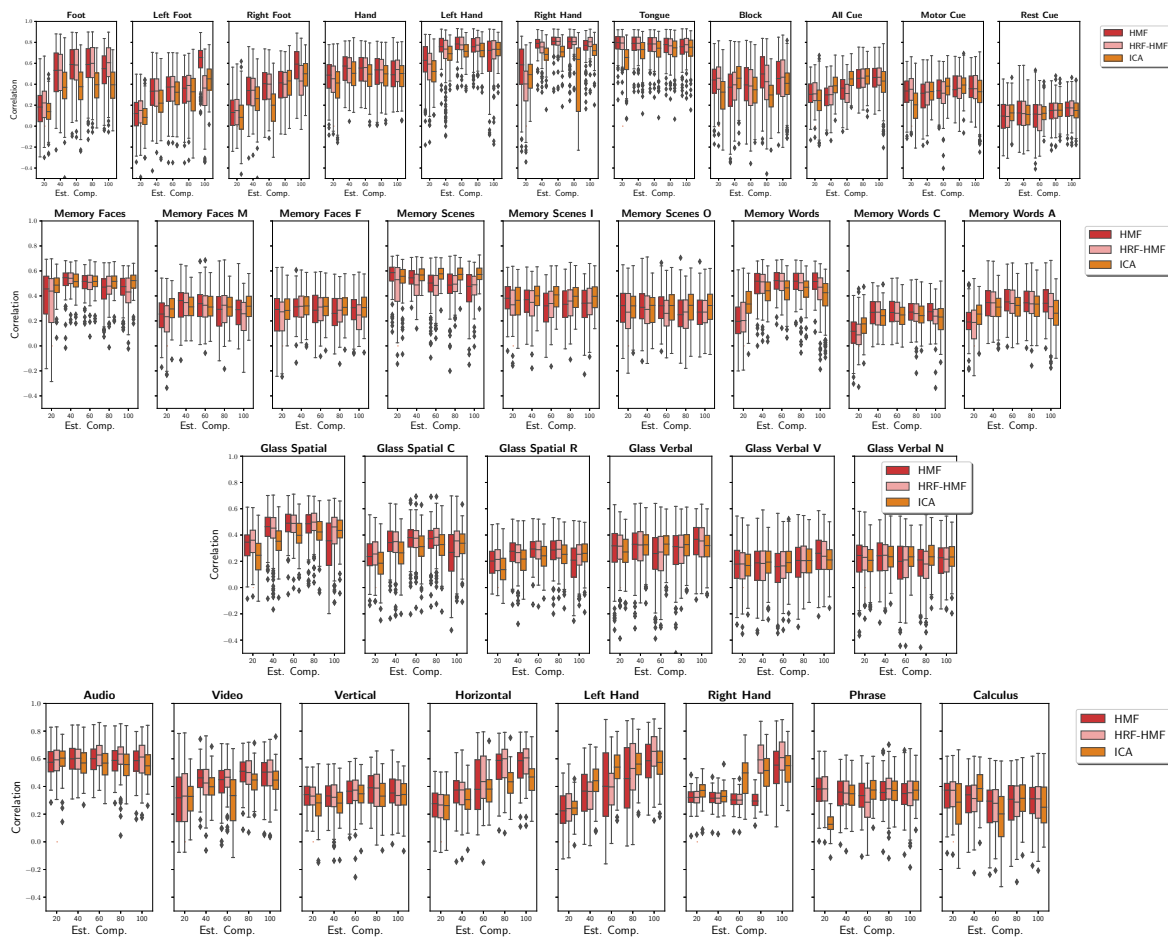

Figure S7: Correlation between task design and BOLD time course estimate of the most task-relevant mode for canonical HMF, subject-specific HMF and MELODIC dependent on the number of estimated modes. Motor task (1st row), incidental memory task (2nd row), glasslexical task (3rd row) and Brainomics task (4th row).

Figure S8

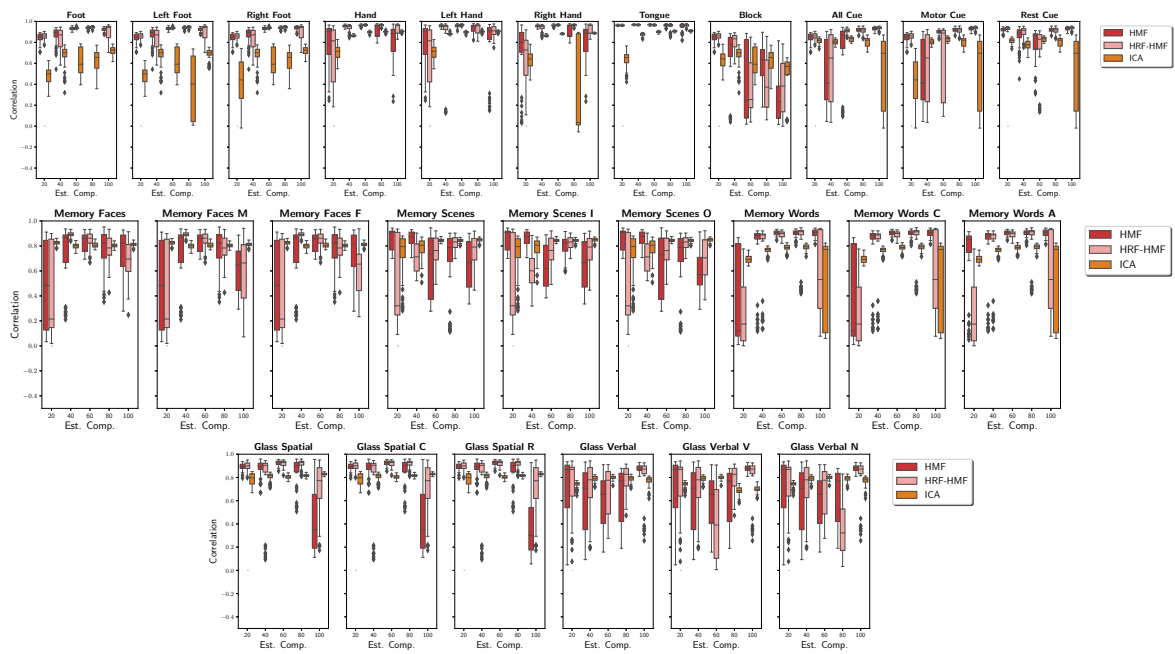

Figure S9: Spatial reproducibility among 10 sessions of the most task-relevant mode for canonical HMF, subject-specific HMF and MELODIC dependent on the number of estimated modes. Motor task (1st row), incidental memory task (2nd row) and glasslexical task (3rd row).

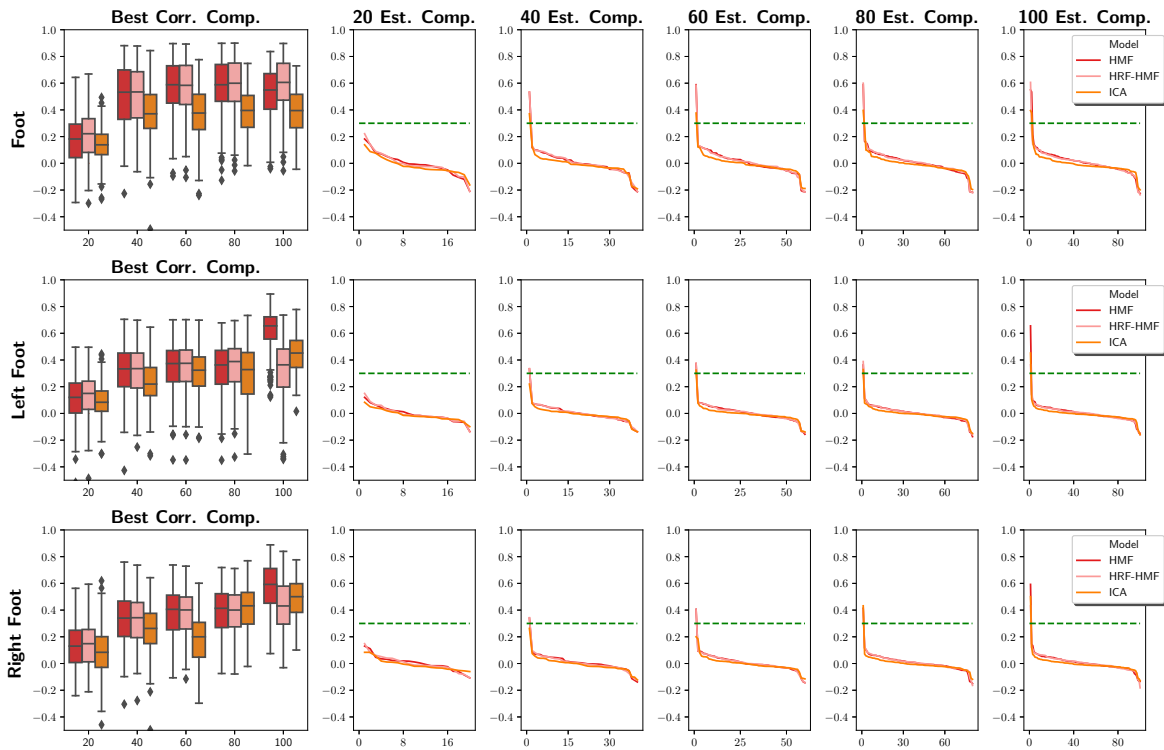

Figure S10: Correlation between task design and BOLD time course estimate of the most task-relevant mode obtained with canonical HMF, subject-specific HMF and MELODIC (first column). Median correlation between task design and BOLD time course estimate sorted in descending order for all modes of a decomposition in either 20 (second column), 40 (third column), 60 (fourth column), 80 (fifth column) and 100 modes (sixth column). The dotted green line marks a threshold of 0.3.



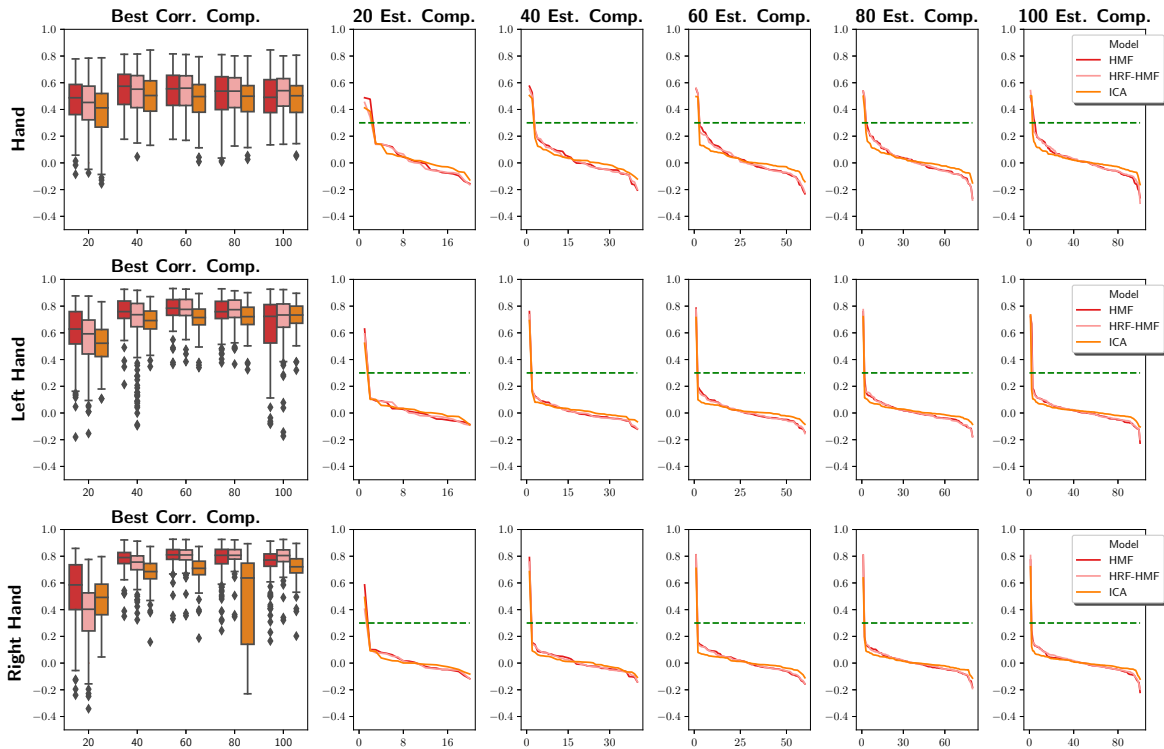

Figure S11: Correlation between task design and BOLD time course estimate of the most task-relevant mode obtained with canonical HMF, subject-specific HMF and MELODIC (first column). Median correlation between task design and BOLD time course estimate sorted in descending order for all modes of a decomposition in either 20 (second column), 40 (third column), 60 (fourth column), 80 (fifth column) and 100 modes (sixth column). The dotted green line marks a threshold of 0.3.

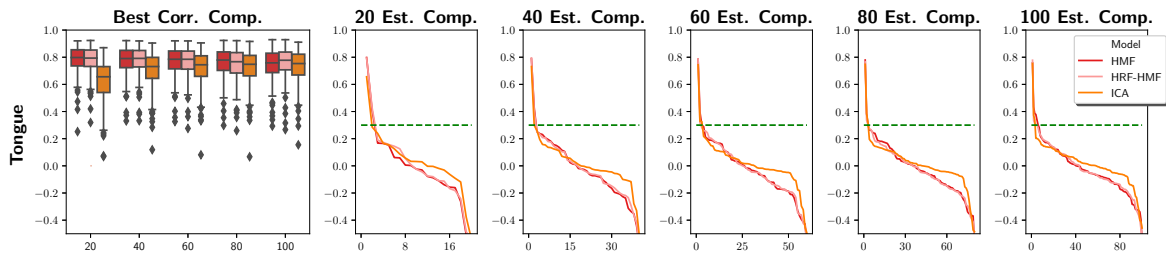

Figure S12: Correlation between task design and BOLD time course estimate of the most task-relevant mode obtained with canonical HMF, subject-specific HMF and MELODIC (first column). Median correlation between task design and BOLD time course estimate sorted in descending order for all modes of a decomposition in either 20 (second column), 40 (third column), 60 (fourth column), 80 (fifth column) and 100 modes (sixth column). The dotted green line marks a threshold of 0.3.

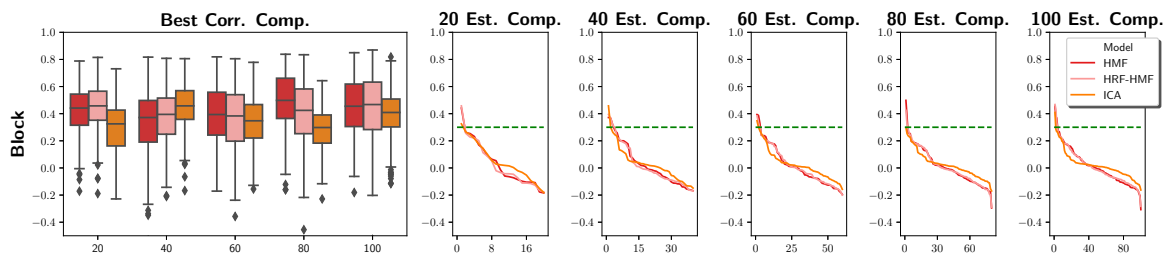

Figure S13: Correlation between task design and BOLD time course estimate of the most task-relevant mode obtained with canonical HMF, subject-specific HMF and MELODIC (first column). Median correlation between task design and BOLD time course estimate sorted in descending order for all modes of a decomposition in either 20 (second column), 40 (third column), 60 (fourth column), 80 (fifth column) and 100 modes (sixth column). The dotted green line marks a threshold of 0.3.

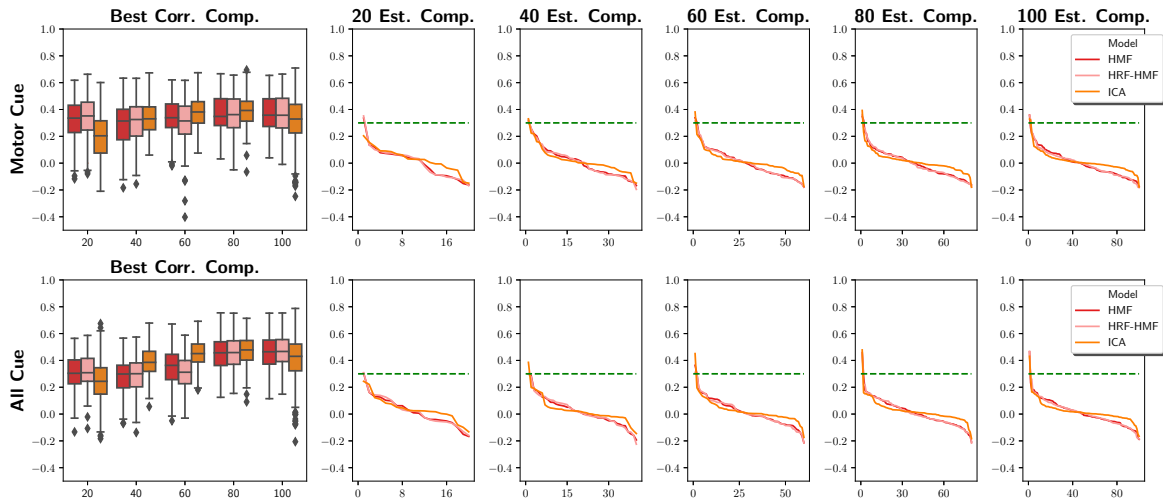

Figure S14: Correlation between task design and BOLD time course estimate of the most task-relevant mode obtained with canonical HMF, subject-specific HMF and MELODIC (first column). Median correlation between task design and BOLD time course estimate sorted in descending order for all modes of a decomposition in either 20 (second column), 40 (third column), 60 (fourth column), 80 (fifth column) and 100 modes (sixth column). The dotted green line marks a threshold of 0.3.

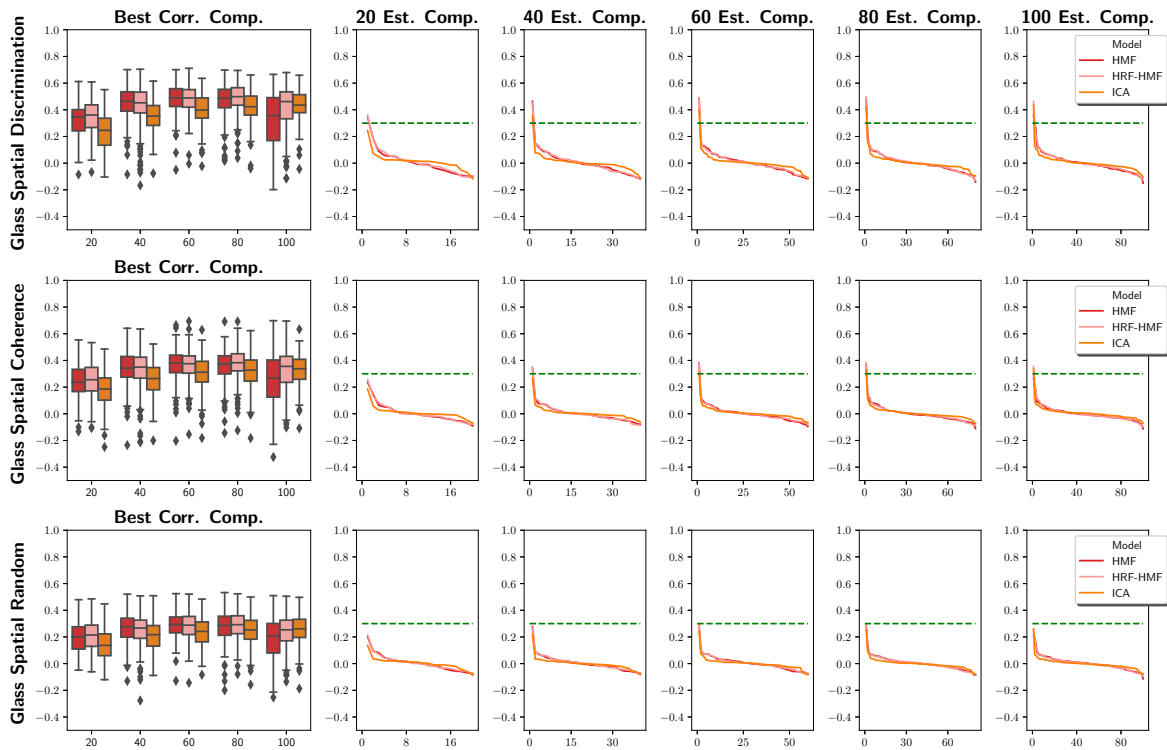

Figure S15: Correlation between task design and BOLD time course estimate of the most task-relevant mode obtained with canonical HMF, subject-specific HMF and MELODIC (first column). Median correlation between task design and BOLD time course estimate sorted in descending order for all modes of a decomposition in either 20 (second column), 40 (third column), 60 (fourth column), 80 (fifth column) and 100 modes (sixth column). The dotted green line marks a threshold of 0.3.

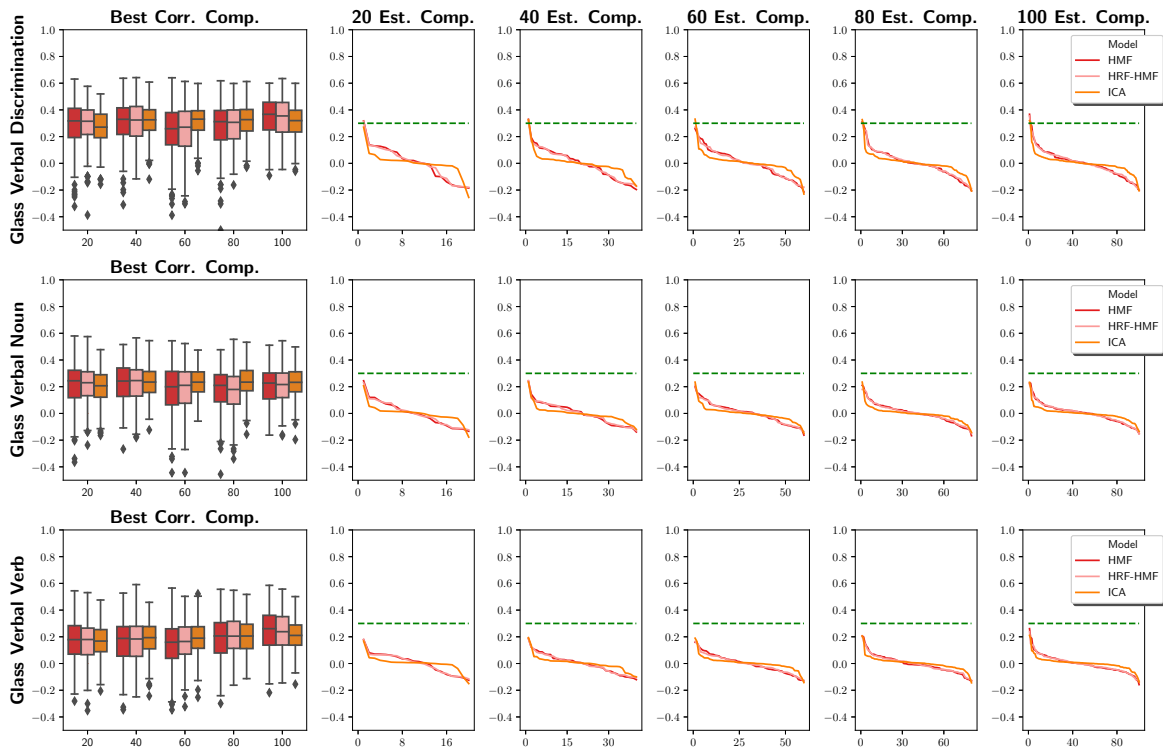

Figure S16: Correlation between task design and BOLD time course estimate of the most task-relevant mode obtained with canonical HMF, subject-specific HMF and MELODIC (first column). Median correlation between task design and BOLD time course estimate sorted in descending order for all modes of a decomposition in either 20 (second column), 40 (third column), 60 (fourth column), 80 (fifth column) and 100 modes (sixth column). The dotted green line marks a threshold of 0.3.

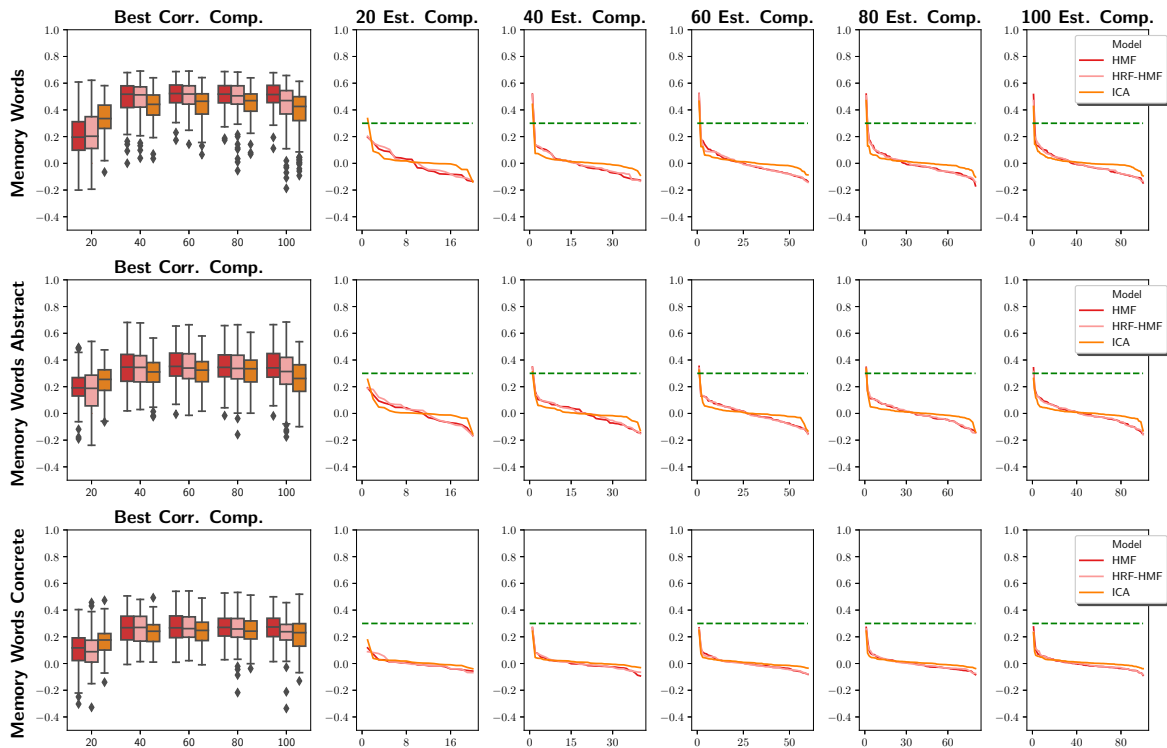

Figure S17: Correlation between task design and BOLD time course estimate of the most task-relevant mode obtained with canonical HMF, subject-specific HMF and MELODIC (first column). Median correlation between task design and BOLD time course estimate sorted in descending order for all modes of a decomposition in either 20 (second column), 40 (third column), 60 (fourth column), 80 (fifth column) and 100 modes (sixth column). The dotted green line marks a threshold of 0.3.

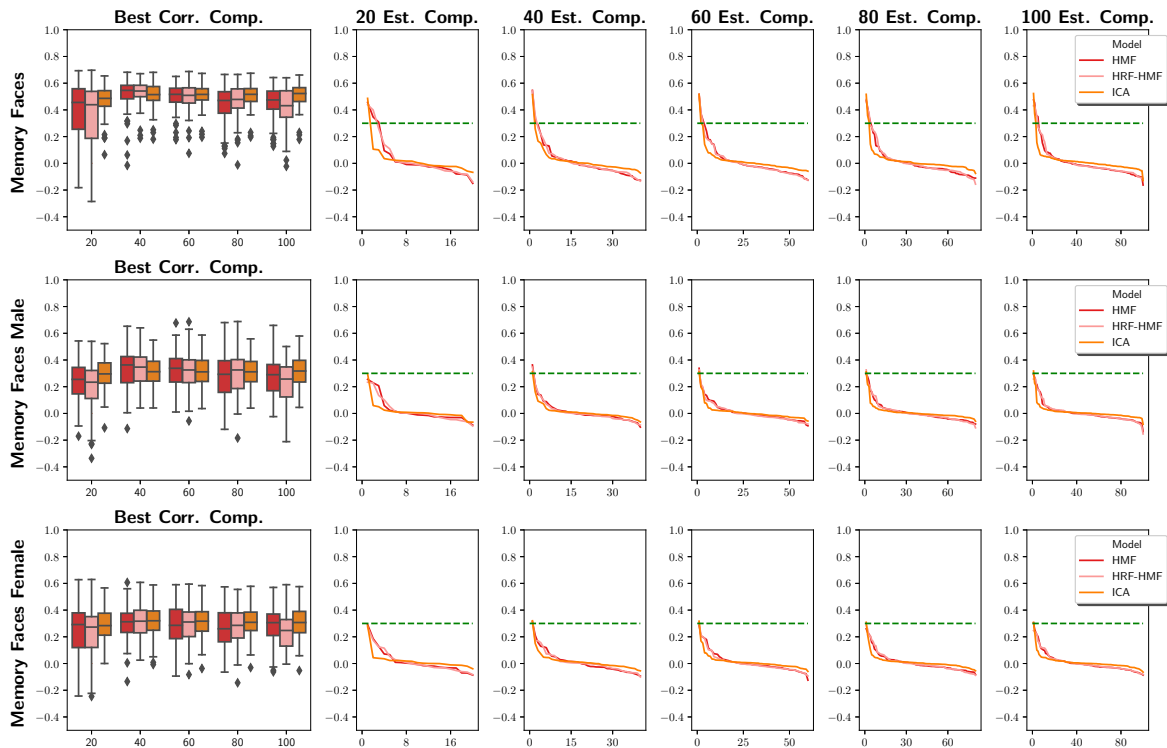

Figure S18: Correlation between task design and BOLD time course estimate of the most task-relevant mode obtained with canonical HMF, subject-specific HMF and MELODIC (first column). Median correlation between task design and BOLD time course estimate sorted in descending order for all modes of a decomposition in either 20 (second column), 40 (third column), 60 (fourth column), 80 (fifth column) and 100 modes (sixth column). The dotted green line marks a threshold of 0.3.

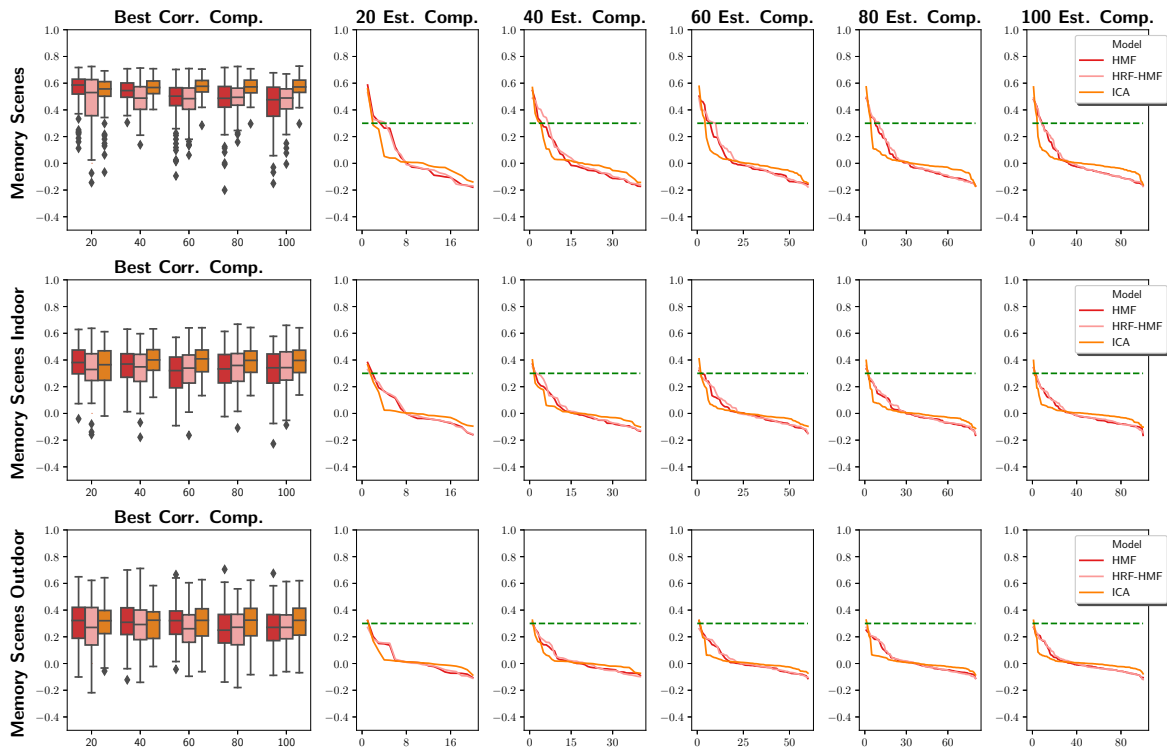

Figure S19: Correlation between task design and BOLD time course estimate of the most task-relevant mode obtained with canonical HMF, subject-specific HMF and MELODIC (first column). Median correlation between task design and BOLD time course estimate sorted in descending order for all modes of a decomposition in either 20 (second column), 40 (third column), 60 (fourth column), 80 (fifth column) and 100 modes (sixth column). The dotted green line marks a threshold of 0.3.



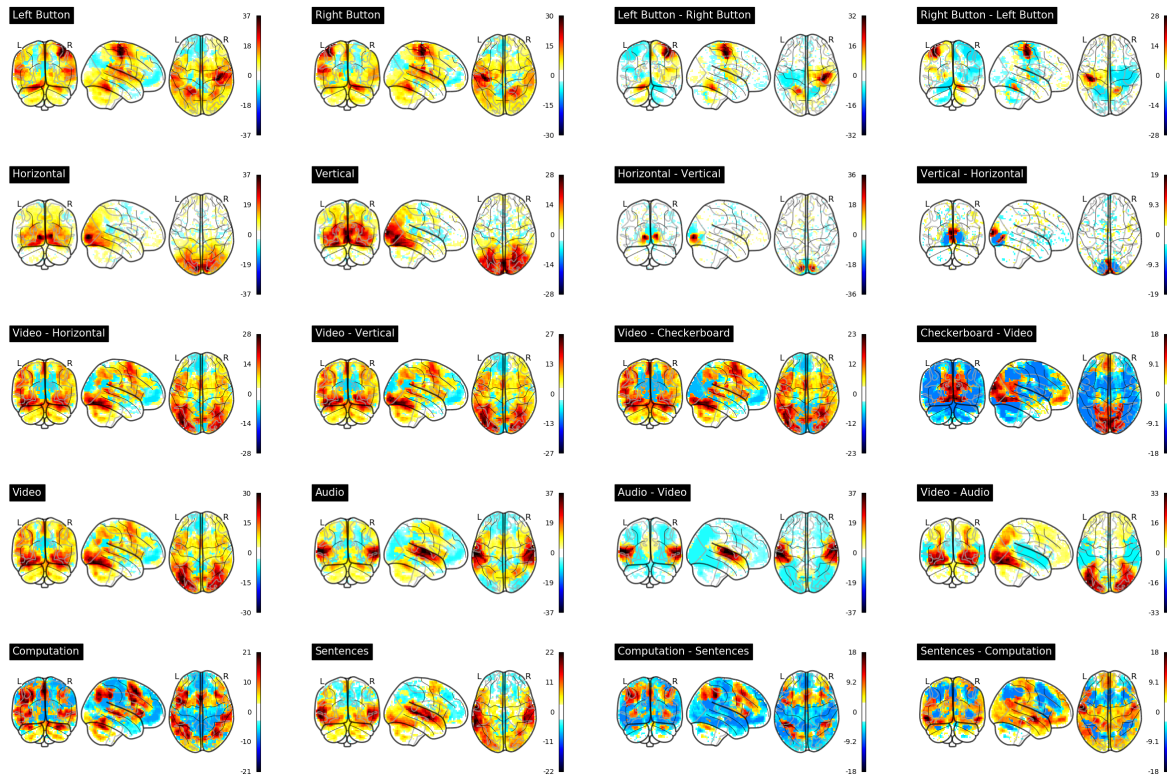

Figure S20: The spatial maps (z-values) of 20 computed contrasts obtained with a second level GLM analysis on the Brainomics task data.

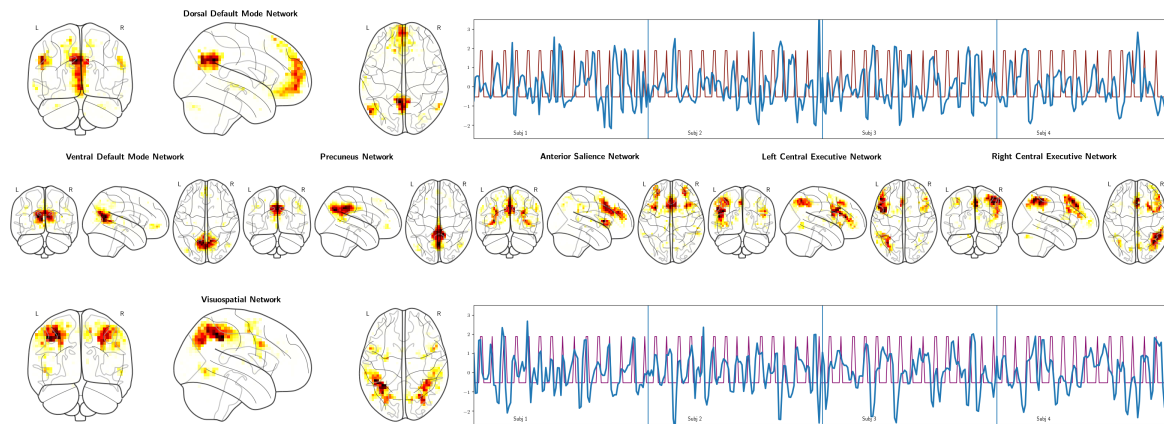

Figure S21: The first and third row depict spatial map and neural activation time course of modes that resembled the dorsal dDMN and VSN, respectively. The neural activation time course (blue line) is superimposed on task timings of the visual motor task cues (red line). The median correlation between visual cue task timings and estimated neural activation time course is  $-0.23$  and  $0.28$ , for dDMN and VSN, respectively (averaged over all sessions and subjects). The second row depicts vDMN, PN, ANS, LCEN, RCEN. The corresponding median correlations for these modes are  $-0.02$ ,  $-0.07$ ,  $0.06$ ,  $0.08$  and  $0.24$ , respectively.

583 In contrast to HMF, the GLM enables to juxtapose distinct stimuli types (Fig. S20) but does not allow  
 584 modeling of signal variations from so called resting-state or task-free brain networks. In the following, neural  
 585 activation patterns in task-unrelated networks that presented during task performance were examined. Commonly  
 586 known resting-state networks such as dorsal and ventral default mode network (dDMN and vDMN), Precuneus  
 587 network (PREC), left and right central executive network (LCEN and RCEN), visuospatial network (VSN) and  
 588 anterior salience network (ASN) were selected for detailed examination.

589 The seven corresponding modes of the MSC motor task of session one (among 40 estimated modes) are depicted  
 590 in Figure S21. The first row depicts the spatial map and neural activation time course (blue line) superimposed  
 591 on corresponding task timings of visual cues (red line) for the dDMN. The dDMN showed the strongest negative  
 592 correlation ( $-0.23$  on average across all motor task sessions) to visual cue task timings. The second row depicts  
 593 the spatial maps of the other six networks and their corresponding average correlation with visual cue task timings  
 594 (median and MAD of correlations in Table S1).

595 These seven modes were also found in the Brainomics task (spatial maps, mean and standard deviation of  
 596 neural activation time courses in Figure S22). Similar to MSC tasks, obtained default mode networks negatively  
 597 correlated with task timings. Figure S22 depicts spatial maps and average neural activation time courses of HMF  
 598 modes that resembled dDMN, vDMN, PREC, LCEN, RCEN, ASN and VSN in the Brainomics task (among 40  
 599 estimated modes). The ASN is known as a mediator between DMNs and other networks such as LCEN, RCEN  
 600 and VSN. The observed neural activation time courses in our analysis support this hypothesis. The average neural

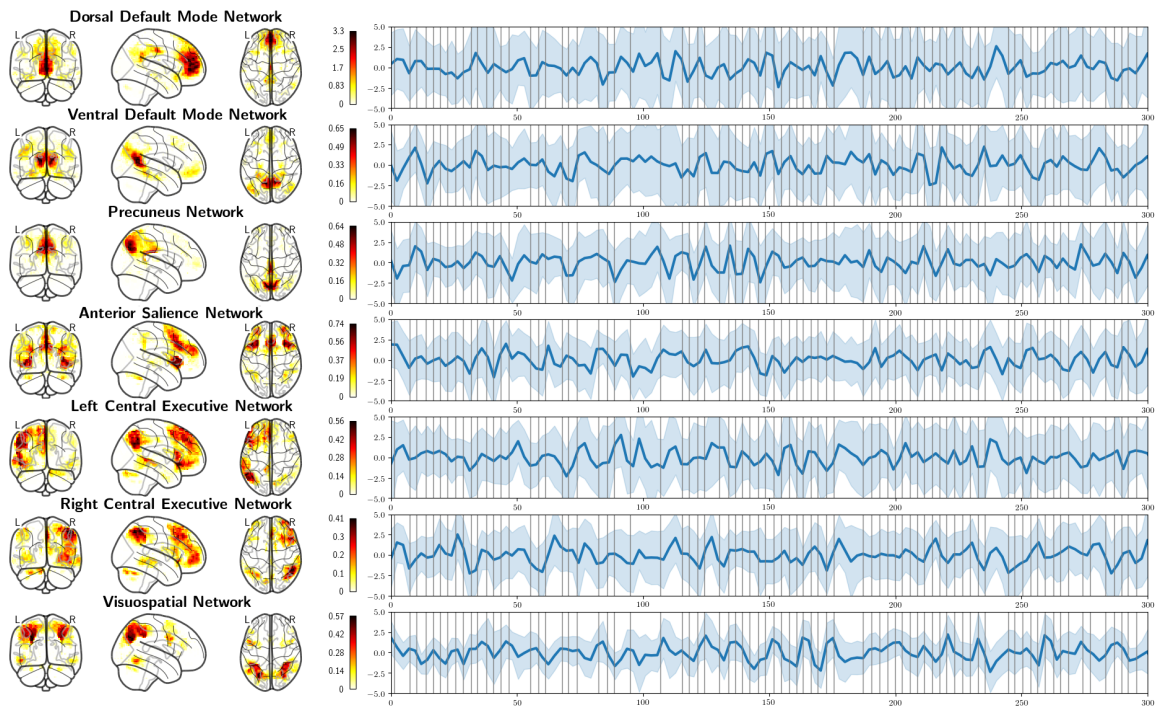

Figure S22: The spatial maps, average and standard deviation for neural activation time courses for modes identified as dDMN, vDMN, PN, LCEN, RCEN, ASN and VSN (among 40 estimated modes).

601 activation time course (red dashed line) of the ASN across all subjects correlated negatively with the average  
602 neural activation time course of dDMN, vDMN and PREC, and correlated positively with the average neural  
603 activation time course of LCEN, RCEN, and VSN mode (median and MAD of correlations in Table S3).

| Stimuli Type | dDMN         | vDMN  | PREC  | ASN   | LCEN  | RCEN        | VSN         |
|--------------|--------------|-------|-------|-------|-------|-------------|-------------|
| Foot         | 0.07         | -0.03 | -0.03 | 0.05  | 0.0   | -0.02       | -0.03       |
| Hand         | -0.12        | -0.08 | -0.06 | 0.03  | 0.05  | -0.0        | 0.17        |
| Left Foot    | 0.03         | 0.03  | -0.01 | -0.01 | -0.04 | -0.04       | -0.04       |
| Right Foot   | 0.03         | -0.05 | -0.04 | 0.02  | -0.01 | 0.02        | 0.02        |
| Left Hand    | -0.05        | -0.04 | -0.06 | -0.04 | -0.0  | 0.01        | 0.09        |
| Right Hand   | -0.09        | -0.05 | -0.04 | 0.05  | 0.08  | 0.03        | 0.13        |
| Tongue       | -0.12        | -0.06 | 0.03  | 0.19  | 0.08  | 0.19        | 0.14        |
| Block        | -0.15        | -0.14 | -0.1  | 0.07  | 0.09  | 0.1         | 0.18        |
| Motor Cue    | <b>-0.23</b> | -0.05 | -0.12 | 0.11  | 0.04  | <b>0.2</b>  | <b>0.26</b> |
| All Cue      | <b>-0.23</b> | -0.02 | -0.07 | 0.06  | 0.08  | <b>0.24</b> | <b>0.28</b> |
| Rest Cue     | 0.01         | 0.08  | 0.02  | -0.02 | 0.09  | 0.06        | 0.03        |

Table S1: The median correlation between the neural activation time course and corresponding task timings of seven resting-state modes in the MSC motor task (among 40 estimated modes). Values over 0.2 are highlighted in bold.

| Stimuli Type | dDMN         | vDMN         | PREC  | ASN         | LCEN  | RCEN        | VSN         |
|--------------|--------------|--------------|-------|-------------|-------|-------------|-------------|
| Foot         | 0.12         | -0.07        | -0.04 | 0.02        | -0.01 | -0.09       | -0.09       |
| Hand         | -0.16        | -0.11        | -0.14 | -0.02       | 0.07  | -0.08       | <b>0.21</b> |
| Left Foot    | 0.03         | 0.03         | -0.02 | 0.01        | -0.05 | -0.1        | -0.09       |
| Right Foot   | 0.05         | -0.11        | -0.05 | -0.01       | -0.03 | 0.03        | 0.01        |
| Left Hand    | -0.04        | -0.07        | -0.12 | -0.05       | -0.03 | -0.03       | 0.11        |
| Right Hand   | -0.1         | -0.07        | -0.05 | 0.05        | 0.07  | 0.0         | 0.15        |
| Tongue       | -0.18        | -0.1         | 0.09  | <b>0.26</b> | 0.1   | <b>0.26</b> | 0.18        |
| Block        | -0.17        | <b>-0.24</b> | -0.12 | 0.08        | 0.14  | 0.1         | <b>0.2</b>  |
| Motor Cue    | <b>-0.33</b> | -0.13        | -0.16 | 0.16        | 0.02  | 0.18        | <b>0.33</b> |
| All Cue      | <b>-0.29</b> | -0.02        | -0.13 | 0.14        | 0.12  | <b>0.24</b> | <b>0.33</b> |
| Rest Cue     | 0.07         | 0.18         | 0.13  | -0.02       | 0.1   | 0.13        | -0.0        |

Table S2: The median correlation between BOLD time course and corresponding task design of seven resting-state modes in the MSC motor task (among 40 estimated modes). Values over 0.2 are highlighted in bold.

| Stimuli Type | dDMN         | vDMN         | PREC         | LCEN        | RCEN         | ASN   | VSN         |
|--------------|--------------|--------------|--------------|-------------|--------------|-------|-------------|
| Audio        | -0.07        | -0.07        | -0.09        | <b>0.27</b> | -0.12        | -0.01 | -0.14       |
| Video        | <b>-0.27</b> | <b>-0.27</b> | -0.08        | <b>0.21</b> | -0.18        | -0.06 | 0.15        |
| Vertical     | 0.02         | 0.02         | 0.06         | -0.14       | 0.05         | -0.03 | 0.01        |
| Horizontal   | 0.01         | 0.07         | 0.16         | -0.07       | -0.01        | -0.08 | -0.02       |
| Left Hand    | -0.19        | -0.09        | -0.09        | 0.17        | -0.08        | -0.06 | -0.06       |
| Right Hand   | -0.1         | 0.01         | 0.1          | 0.13        | -0.1         | -0.12 | -0.08       |
| Phrase       | 0.06         | 0.01         | <b>-0.23</b> | -0.02       | 0.08         | -0.07 | -0.19       |
| Calculus     | <b>-0.22</b> | <b>-0.32</b> | 0.0          | <b>0.34</b> | <b>-0.28</b> | 0.13  | <b>0.27</b> |

Table S3: The median correlation between the neural activation time course and corresponding task timings of seven resting-state modes in the Brainomics data (among 40 estimated modes). Values over 0.2 are highlighted in bold.

| Stimuli Type | dDMN         | vDMN         | PREC        | LCEN         | RCEN         | ASN   | VSN          |
|--------------|--------------|--------------|-------------|--------------|--------------|-------|--------------|
| Audio        | -0.12        | 0.01         | -0.19       | <b>0.3</b>   | -0.08        | 0.11  | <b>-0.22</b> |
| Video        | <b>-0.3</b>  | <b>-0.35</b> | -0.12       | 0.19         | <b>-0.21</b> | -0.02 | <b>0.35</b>  |
| Vertical     | 0.11         | 0.09         | 0.19        | <b>-0.27</b> | 0.08         | -0.09 | 0.07         |
| Horizontal   | -0.02        | 0.04         | <b>0.38</b> | -0.07        | -0.02        | -0.17 | -0.08        |
| Left Hand    | <b>-0.24</b> | -0.15        | -0.1        | 0.16         | -0.09        | -0.02 | -0.01        |
| Right Hand   | -0.16        | 0.04         | 0.1         | 0.05         | -0.06        | -0.12 | -0.08        |
| Phrase       | -0.01        | 0.06         | <b>-0.3</b> | 0.09         | 0.11         | 0.02  | -0.17        |
| Calculus     | -0.15        | <b>-0.34</b> | -0.11       | <b>0.32</b>  | <b>-0.29</b> | 0.19  | <b>0.34</b>  |

Table S4: The median correlation between the BOLD time course and corresponding task design of seven resting-state modes in the Brainomics data (among 40 estimated modes). Values over 0.2 are highlighted in bold.

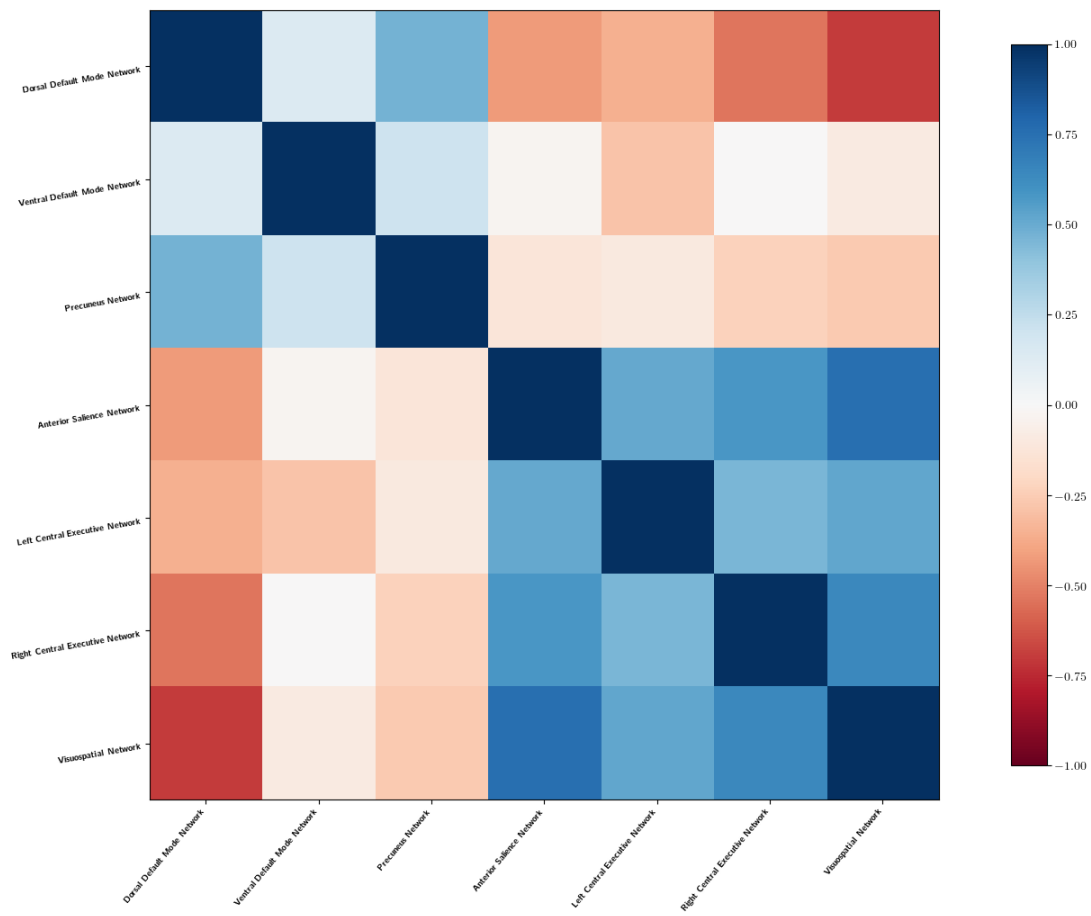

Figure S23: Average of the functional connectivity matrix (average of pairwise correlation between neural activation estimates) between dDMN, vDMN, PN, ASN, LCEN, RCEN and VSN in the MSC motor task runs.

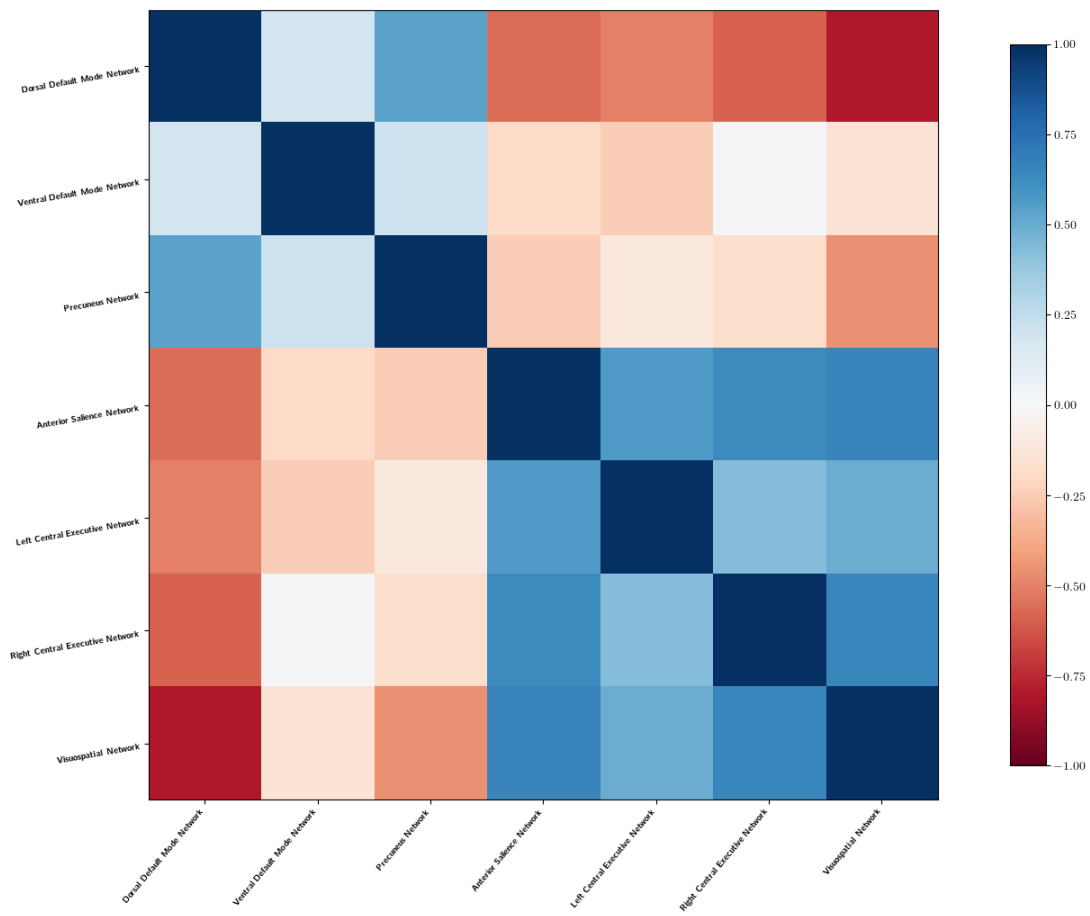

Figure S24: Average of the functional connectivity matrix (average of pairwise correlation between BOLD time course estimates) between dDMN, vDMN, PN, ASN, LCEN, RCEN and VSN in the MSC motor task runs.
